# Supplementary material for: To Be or Not to Be a Pseudogene: A Molecular Epidemiological Approach to the mclx Genes and Its Impact in Tuberculosis
Source: PubMed Central journal article supplement (PMC4452763; doi:10.1371/journal.pone.0128983), 2015-06-02

**A**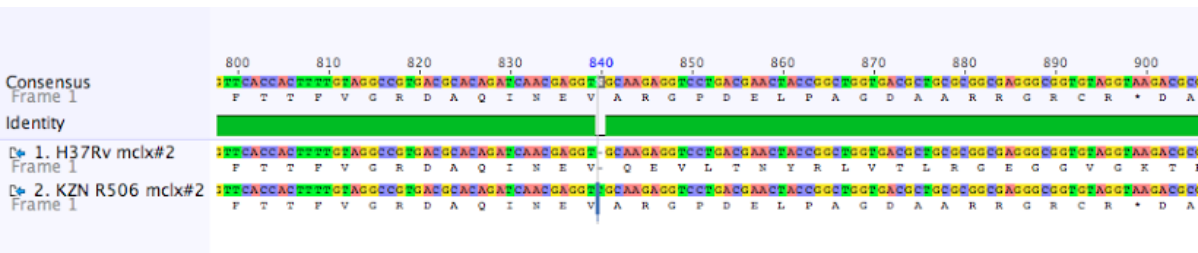**B**

| Read alignment evidence...                                                                |           |        |        |       |       |                                                                       |
|-------------------------------------------------------------------------------------------|-----------|--------|--------|-------|-------|-----------------------------------------------------------------------|
| seq id                                                                                    | position  | change | freq   | score | reads | annotation genes product                                              |
| NC_000962                                                                                 | 1,527,449 | 1 → T  | 100.0% | 213.6 | 61    | coding (838/3480 nt) <i>Rv1358</i> transcriptional regulatory protein |
| Reads supporting (aligned to +/- strand): new base (27/34): ref base (0/0): total (27/34) |           |        |        |       |       |                                                                       |

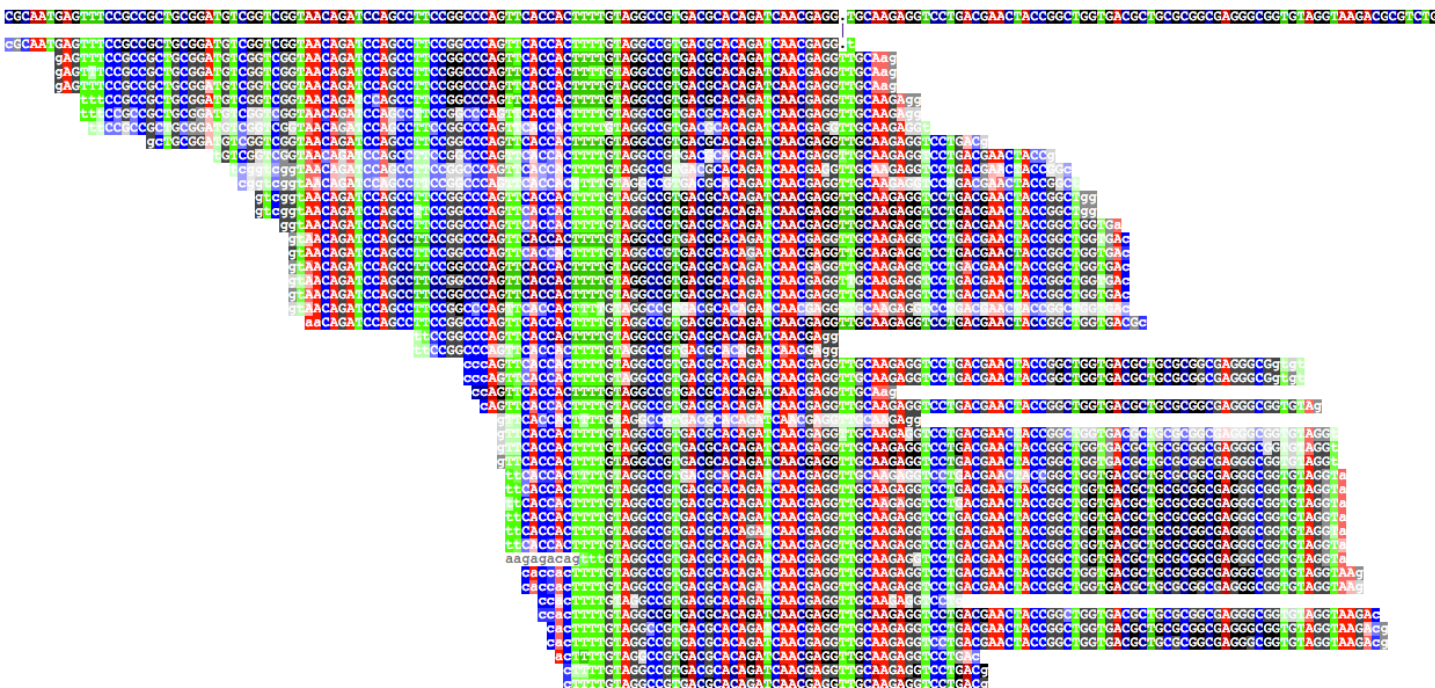**C**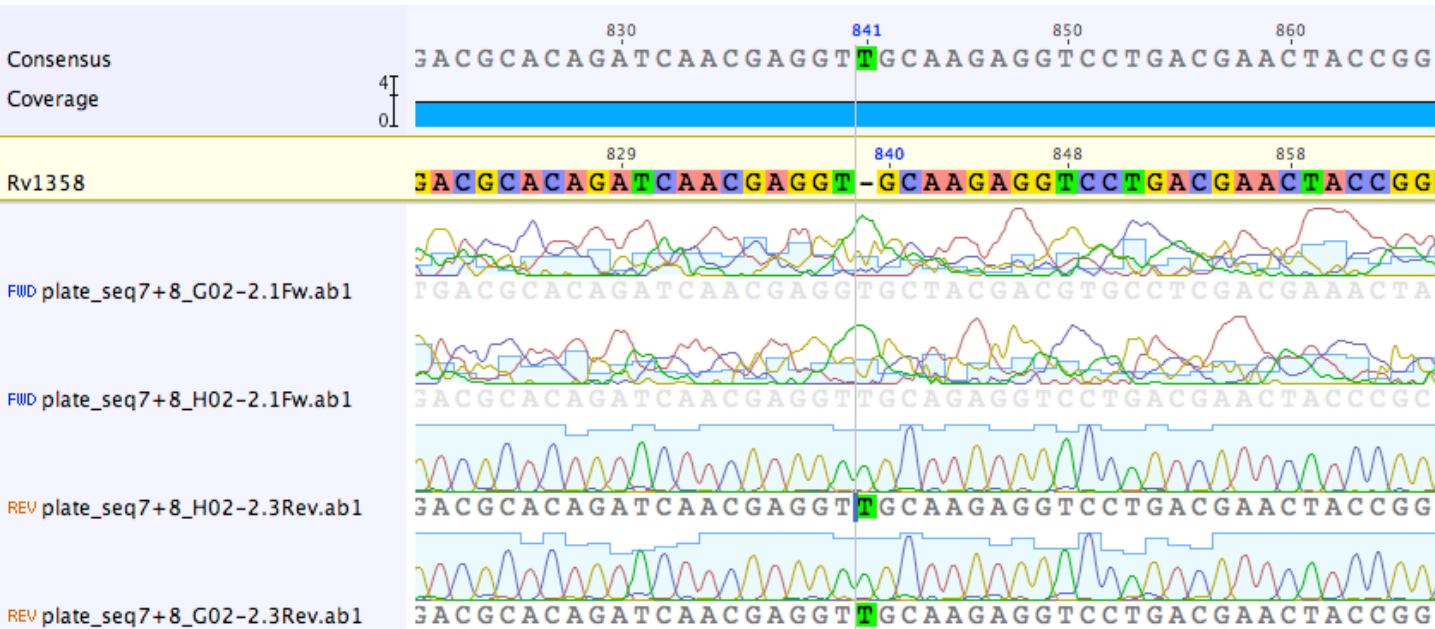

Supplement: pone.0128983.s001.pdf [file pone.0128983.s001.pdf]
