# Supplementary material for: To Be or Not to Be a Pseudogene: A Molecular Epidemiological Approach to the mclx Genes and Its Impact in Tuberculosis
Source: PubMed Central journal article supplement (PMC4452763; doi:10.1371/journal.pone.0128983), 2015-06-02
Supplement: pone.0128983.s002.pdf [file pone.0128983.s002.pdf]

| iso  | transm | year | birth_c     | birth_reg | gen | age | TB_local | lineage   | LSP_lineagr_x | ethn | alc_drug | homeless | h_set | BGC | mclx1 | mclx2              | mclx3           | RFLP | VNTR    | HIV     | DM      | malig | r_insuf | o_transp | med | co_morb |
|------|--------|------|-------------|-----------|-----|-----|----------|-----------|---------------|------|----------|----------|-------|-----|-------|--------------------|-----------------|------|---------|---------|---------|-------|---------|----------|-----|---------|
| 71   | 1      | 2008 | Nigeria     | af        |     | 1   | 58       | 3 CAS     | EAI           | 0    | 1        | 0        | 0     | 2   | 1     | 0                  | 0               | 0    | 0       | 9001110 | 0       | 0     | 0       | 0        | 0   | 0       |
| 331  | 0      | 2009 | Senegal     | af        |     | 1   | 24       | 1 LAM     | EAm           | 0    | 1        | 0        | 0     | 2   | 9     | 0 del-1526658-2646 | 0               | 0    | 9003256 | 0       | 0       | 0     | 0       | 0        | 0   | 0       |
| 446  | 1      | 2009 | Myanmar     | sea       |     | 0   | 57       | 2 EAI     | IO            | 0    | 1        | 0        | 0     | 1   | 9     | 0                  | 0 del-2799489-1 | 0    | 9001132 | 0       | 0       | 0     | 0       | 0        | 0   | 0       |
| 451  | 0      | 2009 | Ecuador     | am        |     | 0   | 38       | 1 H       | EAm           | 0    | 1        | 0        | 0     | 1   | 1     | 0                  | 0               | 0    | 9003263 | 0       | 0       | 0     | 0       | 0        | 0   | 0       |
| 505  | 0      | 2009 | Netherlands | eu        |     | 1   | 47       | 1 EAI     | IO            | 0    | 0        | 0        | 0     | 1   | 0     | 0                  | 0 del-2799489-5 | 0    | 9003246 | 0       | 0       | 0     | 0       | 0        | 0   | 0       |
| 1160 | 1      | 2010 | Cameroon    | af        |     | 0   | 36       | 2 LAM     | EAm           | 0    | 1        | 0        | 0     | 2   | 9     | 9                  | 0               | 0    | 9001822 | 1       | 0       | 0     | 0       | 0        | 0   | 1       |
| 3066 | 0      | 2002 | Morocco     | em        |     | 0   | 25       | 1 CAS     | EAI           | 0    | 1        | 0        | 0     | 1   | 1     | 0                  | 0               | 0    | 1181    | 0       | 0       | 0     | 0       | 0        | 0   | 0       |
| 7021 | 1      | 2001 | Cameroon    | af        |     | 1   | 30       | 3 HAARLEM | EAm           | 0    | 1        | 0        | 0     | 2   | 9     | 0                  | 0               | 0    | 860     | 0       | 1       | 0     | 0       | 0        | 0   | 1       |
| 7405 | 1      | 2001 | Somalia     | em        |     | 1   | 18       | 3 EAI     | IO            | 0    | 1        | 0        | 0     | 1   | 0     | 0                  | 0 del-2799489-5 | 0    | 295123  | 0       | 0       | 0     | 0       | 0        | 0   | 0       |
| 7445 | 1      | 2002 | India       | sea       |     | 1   | 30       | 3 CAS     | EAI           | 0    | 1        | 0        | 0     | 2   | 9     | 0                  | 0               | 0    | 986     | 0       | 0       | 0     | 0       | 0        | 0   | 0       |
| 7453 | 1      | 2002 | Indonesia   | sea       |     | 0   | 25       | 2 EAI     | IO            | 0    | 1        | 0        | 0     | 1   | 0     | 0                  | 0 del-2799489-5 | 0    | 858     | 0       | 0       | 0     | 0       | 0        | 0   | 0       |
| 7483 | 1      | 2002 | Vietnam     | wp        |     | 0   | 24       | 2 EAI     | IO            | 0    | 1        | 0        | 0     | 1   | 9     | 0                  | 0 del-2799489-1 | 0    | 295017  | 0       | 0       | 0     | 0       | 0        | 0   | 0       |
| 7485 | 1      | 2002 | Algeria     | af        |     | 1   | 19       | 1 BEIJING | EAs           | 0    | 1        | 0        | 0     | 1   | 1     | 0                  | 0               | 0    | 1151    | 0       | 0       | 0     | 0       | 0        | 0   | 0       |
| 7505 | 1      | 2002 | Turkey      | eu        |     | 1   | 24       | 1 H       | EAm           | 0    | 1        | 0        | 0     | 1   | 1     | 0                  | 0               | 0    | 653     | 0       | 0       | 0     | 0       | 0        | 0   | 0       |
| 7543 | 1      | 2002 | Vietnam     | wp        |     | 1   | 40       | 1 EAI     | IO            | 1    | 1        | 0        | 0     | 1   | 0     | 0                  | 0 del-2799489-5 | 0    | 1128134 | 0       | 0       | 0     | 0       | 0        | 0   | 0       |
| 7565 | 1      | 2002 | Afghanistan | em        |     | 1   | 22       | 1 H       | EAm           | 0    | 1        | 0        | 0     | 1   | 1     | 0                  | 0               | 0    | 859     | 0       | 0       | 0     | 0       | 0        | 0   | 0       |
| 7570 | 0      | 2002 | Somalia     | em        |     | 0   | 36       | 3 CAS     | EAI           | 0    | 1        | 0        | 0     | 3   | 9     | 0                  | 0               | 0    | 1134    | 0       | 0       | 0     | 0       | 0        | 0   | 0       |
| 7587 | 1      | 2002 | Burma       | sea       |     | 1   | 45       | 1 EAI     | IO            | 1    | 1        | 0        | 0     | 1   | 1     | 9                  | 0 del-2799489-5 | 0    | 295138  | 0       | 1       | 0     | 0       | 0        | 0   | 1       |
| 7631 | 1      | 2002 | Cape Verde  | af        |     | 1   | 19       | 3 LAM     | EAm           | 0    | 1        | 0        | 0     | 2   | 9     | 0                  | 0               | 0    | 744     | 0       | 0       | 0     | 0       | 0        | 0   | 0       |
| 7667 | 0      | 2002 | Netherlands | eu        |     | 1   | 47       | 1 EAI     | IO            | 0    | 0        | 0        | 0     | 1   | 0     | 0                  | 0 del-2799489-5 | 0    | 5865    | 0       | 0       | 0     | 0       | 0        | 0   | 0       |
| 7688 | 1      | 2002 | Eritrea     | af        |     | 1   | 39       | 2 T       | EAm           | 0    | 1        | 0        | 0     | 1   | 2     | 9                  | 9               | 0    | 154     | 0       | 0       | 0     | 0       | 0        | 0   | 0       |
| 7696 | 1      | 2002 | Thailand    | sea       |     | 0   | 31       | 3 BEIJING | EAs           | 0    | 1        | 0        | 0     | 2   | 9     | 0                  | 0               | 0    | 5891    | 0       | 0       | 0     | 0       | 0        | 0   | 0       |
| 7700 | 1      | 2002 | Armenia     | eu        |     | 1   | 39       | 1 H       | EAm           | 0    | 1        | 0        | 0     | 1   | 0     | 0                  | 0               | 0    | 1170    | 0       | 0       | 0     | 0       | 0        | 0   | 0       |
| 7724 | 1      | 2002 | Afghanistan | em        |     | 1   | 24       | 1 BEIJING | EAs           | 0    | 1        | 0        | 0     | 2   | 9     | 0                  | 0               | 0    | 1151    | 0       | 0       | 0     | 0       | 0        | 0   | 0       |
| 7726 | 1      | 2002 | Philippines | wp        |     | 0   | 22       | 1 EAI     | IO            | 0    | 1        | 0        | 0     | 1   | 1     | 0                  | 0 del-2799489-5 | 0    | 465     | 0       | 0       | 0     | 0       | 0        | 0   | 0       |
| 7743 | 1      | 9    | 9           | 9         | 9   | 999 | 9 LAM    | EAm       | 9             | 0    | 0        | 0        | 0     | 9   | 0     | 0                  | 0               | 0    | 744     | 0       | 0       | 0     | 0       | 0        | 0   | 0       |
| 7757 | 1      | 2002 | Netherlands | eu        |     | 0   | 83       | 2 EAI     | IO            | 0    | 0        | 0        | 0     | 1   | 9     | 0                  | 0 del-2799489-5 | 0    | 549     | 0       | 0       | 0     | 1       | 0        | 0   | 1       |
| 7767 | 1      | 2002 | Somalia     | em        |     | 0   | 31       | 1 CAS     | EAI           | 0    | 1        | 0        | 0     | 1   | 1     | 0                  | 0               | 0    | 1178    | 0       | 0       | 0     | 0       | 0        | 0   | 0       |
| 7817 | 1      | 2002 | Philippines | wp        |     | 0   | 32       | 2 EAI     | IO            | 0    | 1        | 0        | 0     | 2   | 9     | 0                  | 0 del-2799489-5 | 0    | 949     | 0       | 0       | 0     | 0       | 0        | 0   | 0       |
| 7825 | 1      | 2002 | Pakistan    | em        |     | 1   | 52       | 1 CAS     | EAI           | 0    | 1        | 0        | 0     | 2   | 9     | 0                  | 0               | 0    | 556     | 0       | 0       | 0     | 0       | 0        | 0   | 0       |
| 7851 | 1      | 2002 | Vietnam     | wp        |     | 0   | 26       | 2 EAI     | IO            | 0    | 1        | 0        | 0     | 1   | 1     | 0                  | 0 del-2799489-5 | 0    | 295017  | 0       | 0       | 0     | 0       | 0        | 0   | 0       |
| 7860 | 1      | 2002 | Suriname    | am        |     | 1   | 54       | 1 H       | EAm           | 0    | 1        | 0        | 0     | 2   | 9     | 0                  | 0               | 0    | 994     | 0       | 0       | 0     | 0       | 0        | 0   | 0       |
| 7986 | 1      | 2003 | Turkey      | eu        |     | 1   | 40       | 1 T       | EAm           | 0    | 1        | 0        | 0     | 1   | 9     | 0                  | 0               | 0    | 272     | 0       | 0       | 0     | 0       | 0        | 0   | 0       |
| 7996 | 0      | 2003 | Eritrea     | af        |     | 1   | 17       | 1 CAS     | EAI           | 0    | 1        | 0        | 0     | 1   | 9     | 0                  | 0               | 0    | 1449    | 0       | 0       | 0     | 0       | 0        | 0   | 0       |
| 8222 | 1      | 2003 | Italy       | eu        |     | 1   | 58       | 1 U       | 9             | 1    | 1        | 0        | 0     | 1   | 0     | 0                  | 0               | 0    | 73      | 0       | 0       | 0     | 0       | 0        | 0   | 0       |
| 8311 | 0      | 2003 | Guinea      | af        |     | 1   | 21       | 1 BEIJING | EAs           | 0    | 1        | 0        | 0     | 2   | 9     | 0                  | 0               | 0    | 6446    | 0       | 0       | 0     | 0       | 0        | 0   | 0       |
| 8337 | 1      | 2003 | Etiopie     | af        |     | 1   | 44       | 1 LAM     | EAm           | 0    | 1        | 0        | 0     | 2   | 9     | 0                  | 0               | 0    | 286005  | 0       | 0       | 0     | 0       | 0        | 0   | 0       |
| 8384 | 1      | 2003 | Morocco     | em        |     | 1   | 65       | 2 T       | EAm           | 0    | 1        | 0        | 0     | 2   | 1     | 0                  | 0               | 0    | 97      | 0       | 0       | 1     | 0       | 0        | 0   | 1       |
| 8452 | 1      | 2003 | Vietnam     | wp        |     | 1   | 30       | 1 EAI     | IO            | 0    | 1        | 0        | 0     | 1   | 1     | 0                  | 0 del-2799489-5 | 0    | 1128134 | 0       | 9000031 | 0     | 0       | 0        | 0   | 0       |
| 8538 | 1      | 2004 | Indonesia   | sea       |     | 1   | 65       | 2 EAI     | IO            | 0    | 1        | 0        | 0     | 1   | 1     | 0                  | 0 del-2799489-5 | 0    | 1212    | 9000085 | 0       | 0     | 0       | 0        | 0   | 0       |
| 8805 | 1      | 2004 | Indonesia   | sea       |     | 1   | 62       | 1 H       | EAm           | 0    | 1        | 0        | 0     | 1   | 1     | 0                  | 0               | 0    | 227     | 9000157 | 0       | 0     | 0       | 0        | 0   | 0       |
| 8974 | 1      | 2004 | Turkey      | eu        |     | 1   | 28       | 1 T       | EAm           | 0    | 1        | 0        | 0     | 2   | 1     | 0                  | 0               | 0    | 154     | 9000791 | 0       | 0     | 0       | 0        | 0   | 0       |
| 8989 | 1      | 2005 | Kenya       | af        |     | 0   | 31       | 3 LAM     | EAm           | 0    | 1        | 0        | 0     | 2   | 9     | 0 ins-1527449-1    | 0               | 0    | 7004    | 9000802 | 1       | 0     | 0       | 0        | 0   | 1       |
| 9263 | 1      | 2005 | Irak        | em        |     | 1   | 37       | 2 H       | EAm           | 0    | 1        | 0        | 0     | 1   | 1     | 0                  | 0               | 0    | 528     | 9001150 | 0       | 0     | 0       | 0        | 0   | 0       |
| 9352 | 1      | 2005 | Netherlands | eu        |     | 1   | 45       | 1 BEIJING | EAs           | 0    | 0        | 1        | 0     | 1   | 0     | 0                  | 0               | 0    | 1504    | 9000467 | 0       | 0     | 0       | 0        | 0   | 0       |
| 9447 | 1      | 2006 | Vietnam     | wp        |     | 0   | 29       | 1 EAI     | IO            | 0    | 1        | 0        | 0     | 1   | 1     | 0                  | 0 del-2799489-5 | 0    | 1128134 | 0       | 9001362 | 0     | 0       | 0        | 0   | 0       |
| 9540 | 1      | 2006 | Indonesia   | sea       |     | 0   | 48       | 1 BEIJING | EAs           | 0    | 1        | 0        | 0     | 1   | 9     | 0                  | 0               | 0    | 1189    | 9000726 | 0       | 0     | 0       | 0        | 0   | 0       |
| 9544 | 1      | 2006 | Irak        | em        |     | 1   | 31       | 1 CAS     | EAI           | 0    | 1        | 0        | 0     | 1   | 9     | 0                  | 0               | 0    | 870     | 9000289 | 0       | 0     | 0       | 0        | 0   | 0       |
| 9545 | 1      | 2006 | Etiopie     | af        |     | 1   | 27       | 1 T       | EAm           | 1    | 1        | 0        | 0     | 1   | 9     | 0                  | 0               | 0    | 154     | 9001899 | 1       | 0     | 0       | 0        | 0   | 1       |
| 9584 | 1      | 2006 | Philippines | wp        |     | 0   | 50       | 2 EAI     | IO            | 0    | 1        | 0        | 0     | 1   | 1     | 0                  | 0 del-2799489-5 | 0    | 465     | 9000270 | 0       | 0     | 0       | 0        | 0   | 0       |
| 9627 | 1      | 2006 | Morocco     | em        |     | 0   | 28       | 3 LAM     | EAm           | 0    | 1        | 0        | 0     | 1   | 1     | 0 ins-1527449-1    | 0               | 0    | 1472    | 9001596 | 0       | 0     | 0       | 0        | 0   | 0       |
| 9654 | 1      | 2006 | Swaziland   | af        |     | 0   | 35       | 3 H       | EAm           | 0    | 1        | 0        | 0     | 1   | 1     | 0                  | 0               | 0    | 227     | 9001257 | 0       | 0     | 0       | 0        | 0   | 0       |
| 9676 | 1      | 2006 | Afghanistan | em        |     | 0   | 71       | 2 H       | EAm           | 0    | 1        | 0        | 0     | 1   | 9     | 0                  | 0               | 0    | 859     | 9001653 | 0       | 0     | 0       | 0        | 0   | 0       |
