# Supplementary material for: To Be or Not to Be a Pseudogene: A Molecular Epidemiological Approach to the mclx Genes and Its Impact in Tuberculosis
Source: PubMed Central journal article supplement (PMC4452763; doi:10.1371/journal.pone.0128983), 2015-06-02
Supplement: pone.0128983.s003.pdf [file pone.0128983.s003.pdf]

Supporting table 2

| gene                              | primers' sequence |                      | localization in the genome (nt) |
|-----------------------------------|-------------------|----------------------|---------------------------------|
| <i>mclx1</i><br>(463411-466668)   | 1.1Fw             | CGGTGGCGTCGCTTCGACAT | 463328-463347                   |
|                                   | 1.3Rev            | CACCGAGGCCACAGCGTC   | 464700-464682                   |
|                                   | 1.2 Fw            | GGCCGGACTTTCGCTCACC  | 464486-464505                   |
|                                   | 1.2Rev            | CTGGTAGGCGAGCGGAAGG  | 465780-465761                   |
|                                   | 1.3Fw             | CCCAAGAGGCACGCGAGCTG | 465569-465588                   |
|                                   | 1.1Rev            | CCGTCCCCGAACGCCAATCA | 466695-466676                   |
| <i>mclx2</i><br>(1526612-1530091) | 2.1Fw             | CCAGCGTTTCCTACGGGCG  | 1526542-1526561                 |
|                                   | 2.3Rev            | CGCCGGCAGATCTCGCTCAC | 1527960-1527941                 |
|                                   | 2.2Fw             | TGGGTGCCTGCCGGAGTTA  | 1527762-1527781                 |
|                                   | 2.2Rev            | TCTGCGCCAGGCAGCAAAC  | 1529081-1529062                 |
|                                   | 2.3Fw             | CCGAGGCGATCGAGCTGGC  | 1528881-1528899                 |
|                                   | 2.1Rev            | GCGACAACGCGCAGAAGAGC | 1530170-1530151                 |
| <i>mclx3</i><br>(2797467-2800880) | 3.1Fw             | ACCTTTGGTCGCTGGCTGGC | 2797439-2797458                 |
|                                   | 3.3Rev            | GGATCTGGCGCGACCGTGG  | 2798733-2798715                 |
|                                   | 3.2Fw             | CCCTGCCAGAGATTCGCCGC | 2798497-2798516                 |
|                                   | 3.2Rev            | GCGGCTCTGATCGTCGCGTT | 2799830-2799811                 |
|                                   | 3.3Fw             | CAGGGCGAGTTGTCGGCAG  | 2799633-2799652                 |
|                                   | 3.1Rev            | CACGGGCACTGTAGGTCCGC | 2800950-2800931                 |
