# Supplementary material for: To Be or Not to Be a Pseudogene: A Molecular Epidemiological Approach to the mclx Genes and Its Impact in Tuberculosis
Source: PubMed Central journal article supplement (PMC4452763; doi:10.1371/journal.pone.0128983), 2015-06-02
Supplement: pone.0128983.s004.pdf [file pone.0128983.s004.pdf]

Supporting Table 3

| <i>mclx#2</i>                                    |                  |              | <b>multivariate ORs (95% CI)</b>                                                                      |
|--------------------------------------------------|------------------|--------------|-------------------------------------------------------------------------------------------------------|
|                                                  |                  |              | Model 2                                                                                               |
| patient-related                                  | age              |              | 0.958 (0.912-1.007)<br><i>p</i> =0.089<br><i>B</i> =-0.043; <i>S.E.</i> =0.025<br><i>Wald</i> =2.897  |
|                                                  | ethnicity        | native dutch | 3.702 (0.811-16.898)<br><i>p</i> =0.091<br><i>B</i> =1.309; <i>S.E.</i> =0.775<br><i>Wald</i> =2.854  |
|                                                  |                  | foreign-born | 1 (ref)                                                                                               |
| microorganism-related                            | transmissibility | no           | 1.754 (0.439-7.000)<br><i>p</i> =0.426<br><i>B</i> =0.562; <i>S.E.</i> =0.706<br><i>Wald</i> =0.632   |
|                                                  |                  | yes          | 1 (ref)                                                                                               |
|                                                  | lineage          |              | <i>p</i> =0.357<br><i>Wald</i> = 3.237                                                                |
|                                                  |                  | EAI          | 0.136 (0.015-1.196)<br><i>p</i> =0.072<br><i>B</i> =-1.998; <i>S.E.</i> =1.111<br><i>Wald</i> =3.237  |
|                                                  |                  | EAm          | 1 (ref)                                                                                               |
|                                                  |                  | EAs          | <i>p</i> =0.999<br>0.000 (0.000-.)<br><i>B</i> =-20.230; <i>S.E.</i> =12299.315<br><i>Wald</i> =0.000 |
|                                                  |                  | IO           | <i>p</i> =0.998<br>0.000 (0.000-.)<br><i>B</i> =-20.251; <i>S.E.</i> =7120.660<br><i>Wald</i> =0.000  |
| <b>Omnibus Test (chi-square/<i>p</i>)</b>        |                  |              | 40.620/ <i>p</i> <0.001                                                                               |
| <b>Cox &amp; Snell R<sup>2</sup></b>             |                  |              | 0.285                                                                                                 |
| <b>Nagelkerke R<sup>2</sup></b>                  |                  |              | 0.459                                                                                                 |
| <b>Hosmer and Lemeshow (chi-square/<i>p</i>)</b> |                  |              | 0.792/ <i>p</i> =0.999                                                                                |
| <b><i>n</i></b>                                  |                  |              | 121                                                                                                   |
