# Supplementary material for: To Be or Not to Be a Pseudogene: A Molecular Epidemiological Approach to the mclx Genes and Its Impact in Tuberculosis
Source: PubMed Central journal article supplement (PMC4452763; doi:10.1371/journal.pone.0128983), 2015-06-02
Supplement: pone.0128983.s005.pdf [file pone.0128983.s005.pdf]

Supporting table 4

| independent variables |                       | n                                | univariate ORs (95% CI)       |                                |                                   |
|-----------------------|-----------------------|----------------------------------|-------------------------------|--------------------------------|-----------------------------------|
|                       |                       |                                  | mclx#2 pseudogenization       | mclx#3 pseudogenization        |                                   |
| patient-related       | age                   | 105                              | .970 (0.937-1.004)<br>p=0.080 | 1.016 (0.988-1.045)<br>p=0.264 |                                   |
|                       | gender                |                                  | p=0.463                       | p=0.178                        |                                   |
|                       |                       | female                           | 36                            | 1.436 (0.546-3.773)            | 1.895 (0.747-4.809)               |
|                       |                       | male                             | 69                            | 1 (ref)                        | 1 (ref)                           |
|                       | birth region          |                                  |                               | p=0.558                        | p=0.020                           |
|                       |                       | Africa                           | 19                            | 0.885 (0.268-2.916)<br>p=0.840 | .000 (.000-.)<br>p=0.998          |
|                       |                       | The Americas                     | 10                            | 0.479 (0.088-2.621)<br>p=0.396 | 0.444 (0.048-4.116)<br>p=0.475    |
|                       |                       | Eastern Mediterranean            | 20                            | 0.213 (0.042-1.075)<br>p=0.061 | 0.706 (0.161-3.103)<br>p=0.645    |
|                       |                       | Europe                           | 35                            | 1 (ref)                        | 1 (ref)                           |
|                       |                       | South East Asia                  | 13                            | 0.000 (0.000-.)<br>p=0.999     | 3.429 (0.872-13.483)<br>p=0.078   |
|                       |                       | Western Pacific                  | 8                             | 0.000 (0.000-.)<br>p=0.999     | 28.000 (2.942-266.467)<br>p=0.004 |
|                       | ethnicity             |                                  |                               | p=0.003                        | p=0.602                           |
|                       |                       | native dutch                     | 27                            | 4.606 (1.669-12.714)           | 0.745 (0.247-2.250)               |
|                       |                       | foreign-born                     | 77                            | 1 (ref)                        | 1 (ref)                           |
|                       | house setting         |                                  |                               | p=0.632                        | p=0.030                           |
|                       |                       | rural                            | 67                            | 1 (ref)                        | 1 (ref)                           |
|                       |                       | urban                            | 38                            | 0.783 (0.288-2.131)            | 0.276 (0.087-0.883)               |
|                       | BCG vaccination       |                                  |                               | p=0.721                        | p=0.873                           |
|                       |                       | no                               | 25                            | 1.263 (0.351-4.551)            | 1.098 (0.349-3.458)               |
|                       |                       | yes                              | 30                            | 1 (ref)                        | 1 (ref)                           |
| co-morbidities        |                       |                                  | p=0.328                       | p=0.255                        |                                   |
|                       | no or unknown         | 89                               | 1 (ref)                       | 1 (ref)                        |                                   |
|                       | yes                   | 17                               | 0.460 (0.097-2.183)           | 0.406 (0.086-1.917)            |                                   |
| alcohol or drug use   |                       |                                  | p=0.824                       | p=0.280                        |                                   |
|                       | no or unknown         | 95                               | 1 (ref)                       | 1 (ref)                        |                                   |
|                       | yes                   | 11                               | 0.833 (0.167-4.167)           | 0.313 (0.038-2.578)            |                                   |
| homelessness          |                       |                                  | p=0.831                       | p=0.909                        |                                   |
|                       | no or unknown         | 102                              | 1 (ref)                       | 1 (ref)                        |                                   |
|                       | yes                   | 4                                | 1.286 (0.127-12.998)          | 1.145 (0.114-11.538)           |                                   |
| microbe-related       | lineage               |                                  |                               | p=0.267                        |                                   |
|                       |                       | EAI                              | 15                            | 0.119 (0.015-0.972)<br>p=0.047 | -                                 |
|                       |                       | EAm                              | 56                            | 1 (ref)                        | -                                 |
|                       |                       | EAs                              | 8                             | 0.000 (0.000-.)<br>p=0.999     | -                                 |
|                       |                       | IO                               | 24                            | 0.000 (0.000-.)<br>p=0.998     | 1                                 |
|                       | antibiotic resistance |                                  |                               | p=0.770                        | p=0.881                           |
|                       |                       | none or unknown resistant        | 97                            | 1 (ref)                        | 1 (ref)                           |
|                       |                       |                                  | 8                             | 1.283 (0.241-6.846)            | 1.136 (0.214-6.033)               |
| transmissibility      |                       |                                  | p=0.006                       | p=0.076                        |                                   |
|                       | no                    | 48                               | 4.333 (1.537-12.217)          | 0.412 (0.154-1.098)            |                                   |
|                       | yes                   | 58                               | 1 (ref)                       | 1 (ref)                        |                                   |
| disease-related       | local of infection    |                                  |                               | p=0.559                        |                                   |
|                       |                       | pulmonary TB                     | 71                            | 1 (ref)                        | 1 (ref)                           |
|                       |                       | extra-pulmonary TB               | 16                            | 0.533 (0.109-2.609)<br>p=0.438 | 9.091 (2.741-30.153)<br>p<0.001   |
|                       |                       | pulmonary and extra-pulmonary TB | 18                            | 1.436 (0.442-4.665)<br>p=0.547 | 1.091 (0.270-4.408)<br>p=0.903    |
