# Supplementary material for: To Be or Not to Be a Pseudogene: A Molecular Epidemiological Approach to the mclx Genes and Its Impact in Tuberculosis
Source: PubMed Central journal article supplement (PMC4452763; doi:10.1371/journal.pone.0128983), 2015-06-02
Supplement: pone.0128983.s006.pdf [file pone.0128983.s006.pdf]

Supporting table 5

| <i>mclx#2</i>                                    |                  |              | <b>multivariate ORs (95% CI)</b>                                                                     |
|--------------------------------------------------|------------------|--------------|------------------------------------------------------------------------------------------------------|
|                                                  |                  |              | Model 1                                                                                              |
| patient-related                                  | age              |              | 0.950 (0.903-0.999)<br><i>p</i> =0.047<br><i>B</i> =-0.051; <i>S.E.</i> =0.026<br><i>Wald</i> =3.940 |
|                                                  | ethnicity        | native dutch | 6.845 (1.704-27.502)<br><i>p</i> =0.007<br><i>B</i> =1.924; <i>S.E.</i> =0.710<br><i>Wald</i> =7.349 |
|                                                  |                  | foreign-born | 1 (ref)                                                                                              |
| microbe-related                                  | transmissibility | no           | 1.790 (0.485-6.606)<br><i>p</i> =0.382<br><i>B</i> =0.582; <i>S.E.</i> =0.666<br><i>Wald</i> =0.764  |
|                                                  |                  | yes          | 1 (ref)                                                                                              |
| <b>Omnibus Test (chi-square/<i>p</i>)</b>        |                  |              | 18.640/ <i>p</i> <0.001                                                                              |
| <b>Cox &amp; Snell R<sup>2</sup></b>             |                  |              | 0.166                                                                                                |
| <b>Nagelkerke R<sup>2</sup></b>                  |                  |              | 0.260                                                                                                |
| <b>Hosmer and Lemeshow (chi-square/<i>p</i>)</b> |                  |              | 5.027/ <i>p</i> =0.755                                                                               |
| <b>n</b>                                         |                  |              | 103                                                                                                  |
