# Supplementary material for: To Be or Not to Be a Pseudogene: A Molecular Epidemiological Approach to the mclx Genes and Its Impact in Tuberculosis
Source: PubMed Central journal article supplement (PMC4452763; doi:10.1371/journal.pone.0128983), 2015-06-02
Supplement: pone.0128983.s007.pdf [file pone.0128983.s007.pdf]

Supporting table 6

| mclx#3                                           |                                  |                                                                                                     | multivariate ORs (95% CI)                                                                             |                                                                                                        |                                                                                                         |
|--------------------------------------------------|----------------------------------|-----------------------------------------------------------------------------------------------------|-------------------------------------------------------------------------------------------------------|--------------------------------------------------------------------------------------------------------|---------------------------------------------------------------------------------------------------------|
|                                                  |                                  |                                                                                                     | Model 1                                                                                               | Model 2                                                                                                | Model 3                                                                                                 |
| patient-related                                  | gender                           | female                                                                                              | -                                                                                                     | -                                                                                                      | 0.632 (0.162-2.471)<br><i>p</i> =0.510<br><i>B</i> =-0.458; <i>S.E.</i> =0.695<br><i>Wald</i> =0.434    |
|                                                  |                                  | male                                                                                                | -                                                                                                     | -                                                                                                      | 1 (ref)                                                                                                 |
|                                                  | house setting                    | rural                                                                                               | -                                                                                                     | -                                                                                                      | 1 (ref)                                                                                                 |
|                                                  |                                  | urban                                                                                               | -                                                                                                     | -                                                                                                      | 0.287(0.061-1.352)<br><i>p</i> =0.114<br><i>B</i> =-1.248; <i>S.E.</i> =0.791<br><i>Wald</i> =2.492     |
|                                                  | birth region                     |                                                                                                     | -                                                                                                     | -                                                                                                      | <i>p</i> =0.062<br><i>Wald</i> =10.505                                                                  |
|                                                  |                                  | Africa                                                                                              | -                                                                                                     | -                                                                                                      | 0.000 (0.000-.)<br><i>p</i> =0.998<br><i>B</i> =-20.135;<br><i>S.E.</i> =8708.272<br><i>Wald</i> =0.000 |
|                                                  |                                  | The Americas                                                                                        | -                                                                                                     | -                                                                                                      | 0.547 (0.053-5.636)<br><i>p</i> =0.612<br><i>B</i> =-0.604; <i>S.E.</i> =1.190<br><i>Wald</i> =0.257    |
|                                                  |                                  | Eastern Mediterranean                                                                               | -                                                                                                     | -                                                                                                      | 0.320 (0.049-2.087)<br><i>p</i> =0.233<br><i>B</i> =-1.141; <i>S.E.</i> =0.957<br><i>Wald</i> =1.420    |
|                                                  |                                  | Europe                                                                                              | -                                                                                                     | -                                                                                                      | 1 (ref)                                                                                                 |
|                                                  |                                  | South East Asia                                                                                     | -                                                                                                     | -                                                                                                      | 3.025 (0.470-19.483)<br><i>p</i> =0.244<br><i>B</i> =1.107; <i>S.E.</i> =0.950<br><i>Wald</i> =1.357    |
|                                                  | Western Pacific                  | -                                                                                                   | -                                                                                                     | 24.851 (1.933-319.528)<br><i>p</i> =0.014<br><i>B</i> =3.213; <i>S.E.</i> =1.303<br><i>Wald</i> =6.080 |                                                                                                         |
| microbe-related                                  | transmissibility                 | no                                                                                                  | -                                                                                                     | 0.728 (0.241-2.199)<br><i>p</i> =0.573<br><i>B</i> =-0.318; <i>S.E.</i> =0.564<br><i>Wald</i> =0.317   | 2.079 (0.421-10.259)<br><i>p</i> =0.369<br><i>B</i> =0.732; <i>S.E.</i> =0.815<br><i>Wald</i> =0.807    |
|                                                  |                                  | yes                                                                                                 | -                                                                                                     | 1 (ref)                                                                                                | 1 (ref)                                                                                                 |
| disease-related                                  | local of infection               |                                                                                                     | <i>p</i> =0.001<br><i>Wald</i> = 13.647                                                               | <i>p</i> =0.006<br><i>Wald</i> =10.383                                                                 | <i>p</i> =0.025<br><i>Wald</i> =7.345                                                                   |
|                                                  |                                  | pulmonary TB                                                                                        | 1 (ref)                                                                                               | 1 (ref)                                                                                                | 1 (ref)                                                                                                 |
|                                                  |                                  | extra-pulmonary TB                                                                                  | 9.091 (2.741-30.153)<br><i>p</i> <0.001<br><i>B</i> =2.207; <i>S.E.</i> =0.612<br><i>Wald</i> =13.018 | 7.860 (2.163-28.569)<br><i>p</i> =0.002<br><i>B</i> =2.062; <i>S.E.</i> =0.658<br><i>Wald</i> =9.806   | 13.464(1.951-92.939)<br><i>p</i> =0.008<br><i>B</i> =2.600; <i>S.E.</i> =0.986<br><i>Wald</i> =6.958    |
|                                                  | pulmonary and extra-pulmonary TB | 1.091 (0.270-4.408)<br><i>p</i> =0.903<br><i>B</i> =0.087; <i>S.E.</i> =0.712<br><i>Wald</i> =0.015 | 1.056 (0.259-4.294)<br><i>p</i> =0.940<br><i>B</i> =0.054; <i>S.E.</i> = 0.716<br><i>Wald</i> =0.006  | 4.571 (0.691-30.246)<br><i>p</i> = 0.115<br><i>B</i> =1.520; <i>S.E.</i> =0.964<br><i>Wald</i> =2.484  |                                                                                                         |
| <b>Omnibus Test (chi-square/<i>p</i>)</b>        |                                  |                                                                                                     | 14,269/ <i>p</i> =0.001                                                                               | 14.587/ <i>p</i> =0.002                                                                                | 42.240/ <i>p</i> <0.001                                                                                 |
| <b>Cox &amp; Snell R<sup>2</sup></b>             |                                  |                                                                                                     | 0.127                                                                                                 | 0.130                                                                                                  | 0.331                                                                                                   |
| <b>Nagelkerke R<sup>2</sup></b>                  |                                  |                                                                                                     | 0.193                                                                                                 | 0.197                                                                                                  | 0.503                                                                                                   |
| <b>Hosmer and Lemeshow (chi-square/<i>p</i>)</b> |                                  |                                                                                                     | 0.000/ <i>p</i> =1.000                                                                                | 0.301/ <i>p</i> =0.960                                                                                 | 6.527/ <i>p</i> =0.480                                                                                  |
| <b>n</b>                                         |                                  |                                                                                                     | 105                                                                                                   |                                                                                                        |                                                                                                         |
