# Supplementary material for: To Be or Not to Be a Pseudogene: A Molecular Epidemiological Approach to the mclx Genes and Its Impact in Tuberculosis
Source: PubMed Central journal article supplement (PMC4452763; doi:10.1371/journal.pone.0128983), 2015-06-02
Supplement: pone.0128983.s008.pdf [file pone.0128983.s008.pdf]

Supporting Table 7

| independent variables              |                       | n   | univariate ORs (95% CI)                                                                     |                                                                                 |
|------------------------------------|-----------------------|-----|---------------------------------------------------------------------------------------------|---------------------------------------------------------------------------------|
|                                    |                       |     | exclusively extrapulmonary<br>(vs. pulmonary and disseminated)                              | extrapulmonary or both<br>(vs. exclusively pulmonary)                           |
| age                                |                       | 124 | 1.059 (1.019-1.102)<br>$p=0.004$<br>$B=0.058$ ; $S.E.=0.020$<br>$Wald=8.420$                | 1.020 (0.990-1.051)<br>$p=0.186$<br>$B=0.020$ ; $S.E.=0.015$<br>$Wald=1.749$    |
| gender                             | female                | 46  | 6.575 (1.896-22.802)<br>$p=0.003$<br>$B=1.883$ ; $S.E.=0.634$<br>$Wald=8.810$               | 5.708 (2.216-14.701)<br>$p<0.001$<br>$B=1.742$ ; $S.E.=0.483$<br>$Wald=13.021$  |
|                                    | male                  | 78  | 1 (ref)                                                                                     | 1 (ref)                                                                         |
| birth region                       |                       |     | $p=0.900$<br>$Wald=1.608$                                                                   | $p=0.179$<br>$Wald=7.610$                                                       |
|                                    | Africa                | 23  | $6.883 \times 10^8$ (0.000-.)<br>$p=0.999$<br>$B=20.350$ ; $S.E.=11556.217$<br>$Wald=0.000$ | 11.220 (0.710-177.347)<br>$p=0.086$<br>$B=2.418$ ; $S.E.=1.408$<br>$Wald=2.947$ |
|                                    | The Americas          | 12  | $1.307 \times 10^8$ (0.000-.)<br>$p=0.999$<br>$B=18.689$ ; $S.E.=11556.217$<br>$Wald=0.000$ | 1.874 (0.104-33.760)<br>$p=0.670$<br>$B=0.628$ ; $S.E.=1.475$<br>$Wald=0.181$   |
|                                    | Eastern Mediterranean | 23  | $5.254 \times 10^8$ (0.000-.)<br>$p=0.999$<br>$B=20.080$ ; $S.E.=11556.217$<br>$Wald=0.000$ | 6.247 (0.429-90.932)<br>$p=0.180$<br>$B=1.832$ ; $S.E.=1.366$<br>$Wald=1.798$   |
|                                    | Europe                | 36  | 1 (ref)                                                                                     | 1 (ref)                                                                         |
|                                    | South East Asia       | 17  | $4.683 \times 10^8$ (0.000-.)<br>$p=0.999$<br>$B=19.965$ ; $S.E.=11556.217$<br>$Wald=0.000$ | 3.314 (0.213-51.496)<br>$p=0.392$<br>$B=1.198$ ; $S.E.=1.400$<br>$Wald=0.733$   |
|                                    | Western Pacific       | 13  | $3.313 \times 10^8$ (0.000-.)<br>$p=0.999$<br>$B=19.619$ ; $S.E.=11556.217$<br>$Wald=0.000$ | 1.077 (0.058-19.930)<br>$p=0.960$<br>$B=0.075$ ; $S.E.=1.489$<br>$Wald=0.003$   |
| ethnicity                          | native dutch          | 27  | $9.348 \times 10^7$ (0.000-.)<br>$p=0.999$<br>$B=18.353$ ; $S.E.=11556.217$<br>$Wald=0.000$ | 0.995 (0.064-15.571)<br>$p=0.997$<br>$B=-0.005$ ; $S.E.=1.403$<br>$Wald=0.000$  |
|                                    | foreign-born          | 97  | 1 (ref)                                                                                     | 1 (ref)                                                                         |
| HIV                                | negative              | 111 | 1 (ref)                                                                                     | 1 (ref)                                                                         |
|                                    | positive              | 13  | 0.497 (0.044-5.627)<br>$p=0.572$<br>$B=-0.700$ ; $S.E.=1.239$<br>$Wald=0.319$               | 1.195 (0.279-5.114)<br>$p=0.810$<br>$B=0.178$ ; $S.E.=0.742$<br>$Wald=0.058$    |
| mclx3 status                       | pseudogene            | 30  | 8.259 (1.674-40.761)<br>$p=0.010$<br>$B=2.111$ ; $S.E.=0.814$<br>$Wald=6.720$               | 4.994 (1.430-17.436)<br>$p=0.012$<br>$B=1.608$ ; $S.E.=0.638$<br>$Wald=6.354$   |
|                                    | functional            | 94  | 1 (ref)                                                                                     | 1 (ref)                                                                         |
| Omnibus Test (chi-square/p)        |                       |     | 41.614/ $p<0.001$                                                                           | 33.355/ $p<0.001$                                                               |
| Cox & Snell $R^2$                  |                       |     | 0.285                                                                                       | 0.236                                                                           |
| Nagelkerke $R^2$                   |                       |     | 0.456                                                                                       | 0.324                                                                           |
| Hosmer and Lemeshow (chi-square/p) |                       |     | 5.289/ $p=0.726$                                                                            | 5.420/ $p=0.712$                                                                |
| n                                  |                       |     | 124                                                                                         |                                                                                 |
