# Supplementary material for: To Be or Not to Be a Pseudogene: A Molecular Epidemiological Approach to the mclx Genes and Its Impact in Tuberculosis
Source: PubMed Central journal article supplement (PMC4452763; doi:10.1371/journal.pone.0128983), 2015-06-02
Supplement: pone.0128983.s009.pdf [file pone.0128983.s009.pdf]

Supporting Table 8

|                    |                              |                  | Lineage         |                 |                   |                 | Total |
|--------------------|------------------------------|------------------|-----------------|-----------------|-------------------|-----------------|-------|
|                    |                              |                  | EAI             | EAm             | EAs               | IO              |       |
| local of infection | pumonary TB                  | Count            | 12 <sub>a</sub> | 43 <sub>a</sub> | 9 <sub>a</sub>    | 15 <sub>a</sub> | 79    |
|                    |                              | % within Lineage | 66,7%           | 67,2%           | 90,0%             | 48,4%           | 64,2% |
|                    | extra-pulmonary TB           | Count            | 1 <sub>a</sub>  | 10 <sub>a</sub> | 0 <sub>a, b</sub> | 13 <sub>b</sub> | 24    |
|                    |                              | % within Lineage | 5,6%            | 15,6%           | 0,0%              | 41,9%           | 19,5% |
|                    | pulmonary+extra-pulmonary TB | Count            | 5 <sub>a</sub>  | 11 <sub>a</sub> | 1 <sub>a</sub>    | 3 <sub>a</sub>  | 20    |
|                    |                              | % within Lineage | 27,8%           | 17,2%           | 10,0%             | 9,7%            | 16,3% |
| Total              | Count                        | 18               | 64              | 10              | 31                | 123             |       |
|                    | % within Lineage             | 100,0%           | 100,0%          | 100,0%          | 100,0%            | 100,0%          |       |

Each subscript letter denotes a subset of LSP\_lineage categories whose column proportions do not differ significantly from each other at the 0.05 level (column proportions compared by the z-test with p-values adjusted by the Bonferroni method).
